# Supplementary material
Source: PubMed Central journal article supplement (PMC4323670)
Supplement: NIHMS648497-supplement.pdf [file NIHMS648497-supplement.pdf]

Supplemental Table. Sarcomere Mutations Present in the Study Cohort

| <b>Gene</b>             | <b>Mutation</b> | <b>Number of Families</b> | <b>Number of Individuals</b> |
|-------------------------|-----------------|---------------------------|------------------------------|
| <i>MYH7</i><br>(n=21)   | Arg249Gln       | 1                         | 2                            |
|                         | Ser291Phe       | 1                         | 1                            |
|                         | Glu497Asp       | 2                         | 3                            |
|                         | Arg652Gly       | 1                         | 1                            |
|                         | Arg663Cys       | 2                         | 2                            |
|                         | Arg663His       | 1                         | 2                            |
|                         | Arg719Trp       | 2                         | 2                            |
|                         | Ile736Thr       | 1                         | 1                            |
|                         | Arg719Gln       | 1                         | 1                            |
|                         | Gly768Arg       | 1                         | 1                            |
|                         | Ala797Thr       | 1                         | 3                            |
|                         | Val878Ala       | 1                         | 1                            |
|                         | Glu924Lys       | 1                         | 1                            |
| <i>MYBPC3</i><br>(n=12) | Glu60fs         | 1                         | 2                            |
|                         | Asp75Asn        | 1                         | 1                            |
|                         | Val178Met       | 1                         | 1                            |
|                         | Glu258Lys       | 1                         | 1                            |
|                         | Arg502Trp       | 1                         | 1                            |
|                         | Gly531Arg       | 1                         | 1                            |
|                         | Phe1246fs       | 1                         | 2                            |
|                         | c.1351+1G>A     | 1                         | 1                            |
|                         | c.1928-2A>G     | 1                         | 1                            |
|                         | c.3190+2T>G     | 1                         | 1                            |
| <i>TNNT2</i><br>(n=5)   | Arg92Trp        | 1                         | 1                            |
|                         | Arg278Cys       | 1                         | 4                            |
